# Supplementary material for: RNA-Seq profiling in peripheral blood mononuclear cells of amyotrophic lateral sclerosis patients and controls
Source: PubMed Central journal article supplement (PMC6362931; doi:10.1038/sdata.2019.6), 2019-02-05

Supplementary Figure 1 : Bioanalyzer electropherograms of the libraries. Not available for CTRL5 and CTRL6.

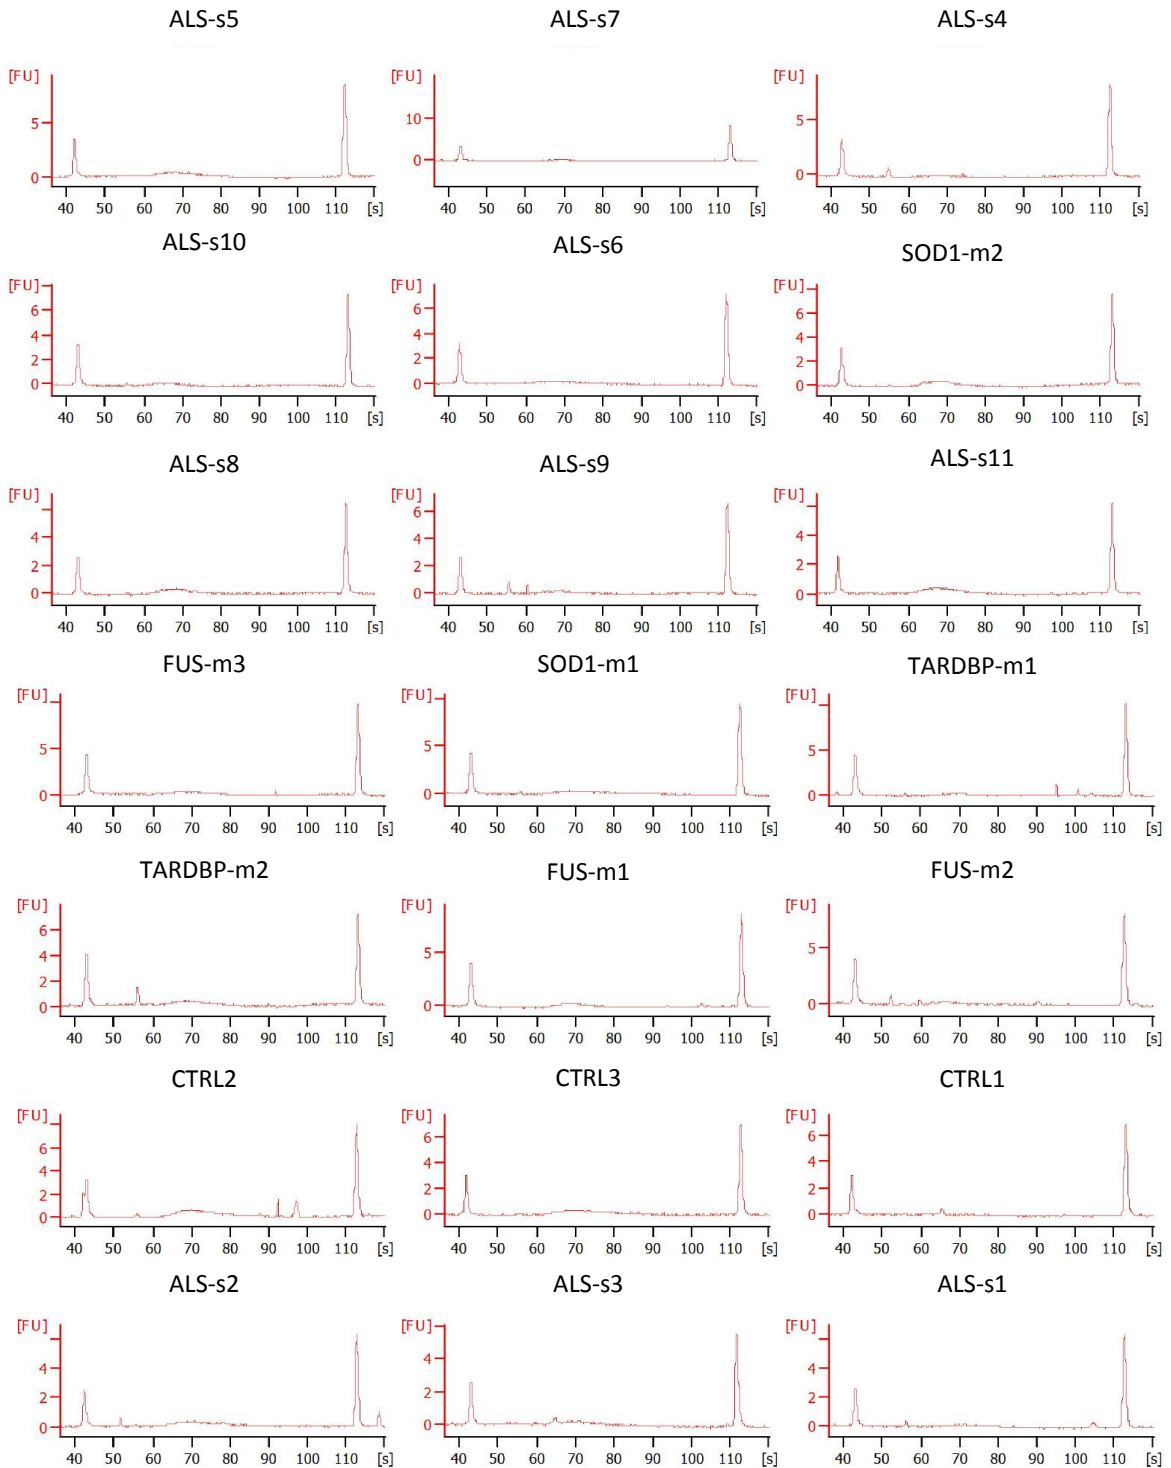

ALS-s15

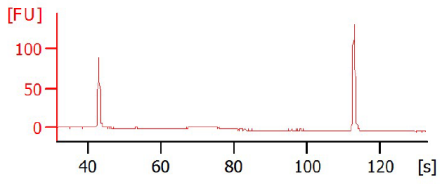

ALS-s16

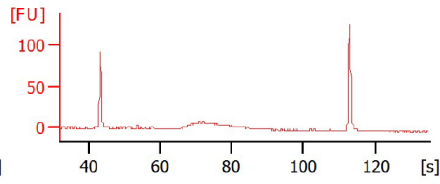

SOD1-m3

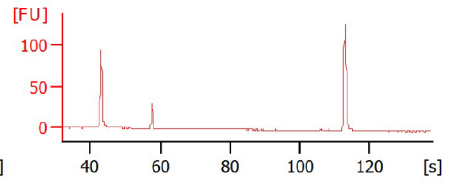

ALS-s13

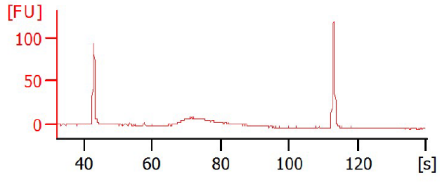

ALS-s12

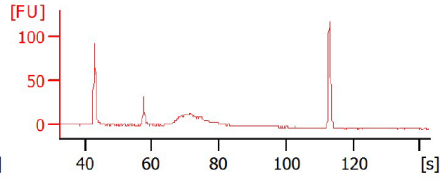

VCP-m1

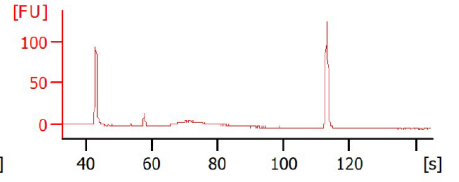

CTRL7

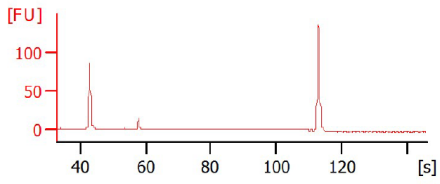

CTRL4

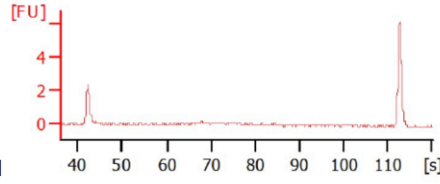

Supplement: sdata20196-s2.pdf [file sdata20196-s2.pdf]
